# Supplementary material for: Strong dichroic emission in the pseudo one dimensional material ZrS3
Source: Royal Society of Chemistry journal article supplement (doi:10.1039/c6nr05238j), 2016-01-01
Supplement: c6nr05238j1.pdf [file c6nr05238j1.pdf]

## Supporting Information

### Strong Dichroic Emission in Pseudo One Dimensional Material $\text{ZrS}_3$

Anupum Pant,<sup>a</sup> Engin Torun,<sup>b</sup> Bin Chen,<sup>a</sup> Soumya Bhat,<sup>a</sup> Xi Fan,<sup>a</sup> Kedi Wu,<sup>a</sup> David P Wright,<sup>c</sup> Francois M. Peeters,<sup>b</sup> Emmanuel Soignard,<sup>c</sup> Hasan Sahin,<sup>b</sup> and Sefaattin Tongay<sup>\*a</sup>

<sup>a</sup> School for Engineering of Matter, Transport and Energy, Arizona State University, Tempe, Arizona 85287, United States

<sup>b</sup> Department of Physics, University of Antwerp, Groenenborgerlaan 171, B-2020 Antwerp, Belgium

<sup>c</sup> LeRoy Eyring Center for Solid State Science, Arizona State University, Tempe, Arizona 85287, United States

\*corresponding author: [Sefaattin.tongay@asu.edu](mailto:Sefaattin.tongay@asu.edu)

The thickness of the exfoliated  $\text{ZrS}_3$  flakes were characterized by atomic force microscopy (AFM). Typical thin and thick flakes measure 7.4 nm and 48.6 nm, respectively.

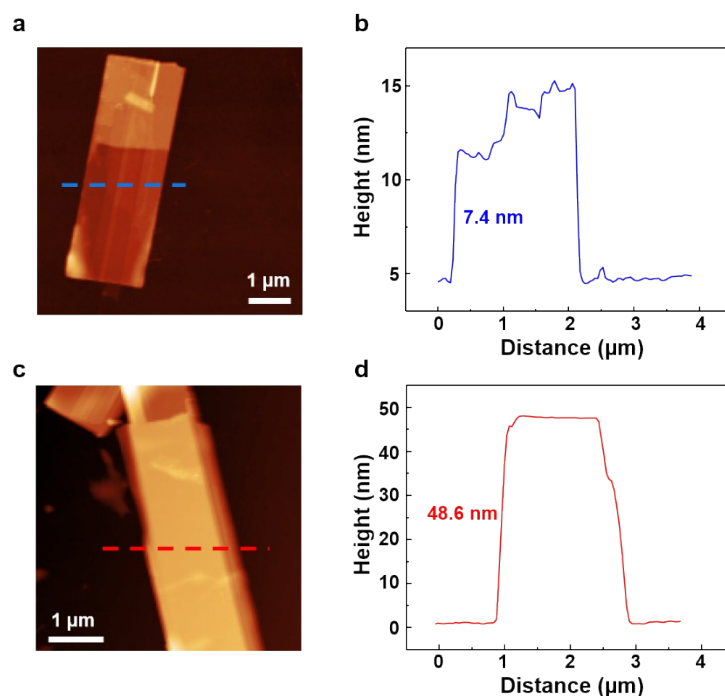

**Figure S1.** Atomic force microscopy (AFM) measurements and height profile for thin (**a** and **b**) and thick (**c** and **d**) flakes.
